# Supplementary material
Source: PubMed Central journal article supplement (PMC3717591)
Supplement: NIHMS481378-supplement-Table_1.pdf [file NIHMS481378-supplement-Table_1.pdf]

**Supplementary Table 1** Thyroid cancer cell mutation profile

| Cell Line | Histology | Mutation   | Mutation analysis reference |
|-----------|-----------|------------|-----------------------------|
| BCPAP     | PTC       | BRAF V600E | Schweppe <i>et al.</i> 2008 |
| KTC1      | PTC       | BRAF V600E | Schweppe <i>et al.</i> 2008 |
| TPC1      | PTC       | RET/PTC1   | Schweppe <i>et al.</i> 2008 |
| FTC133    | FTC       | PTEN null  | Liu <i>et al.</i> 2009      |
| C643      | ATC       | HRAS G13R  | Liu <i>et al.</i> 2009      |
| SW1736    | ATC       | BRAF V600E | Schweppe <i>et al.</i> 2008 |

## References

Schweppe RE, Klopper JP, Korch C, Pugazhenti U, Benezra M, Knauf JA, Fagin JA, Marlow L, Copland JA, Smallridge RC, *et al.* 2008 Deoxyribonucleic acid profiling analysis of 40 human thyroid cancer cell lines reveals cross-contamination resulting in cell line redundancy and misidentification. *Journal of Clinical Endocrinology & Metabolism* **83** 4331–4341.

Liu D, Hou P, Liu Z, Wu G & Xing M 2009 Genetic alterations in the phosphoinositide 3-kinase/AKT signaling pathway confer sensitivity of thyroid cancer cells to therapeutic targeting of akt and mammalian target of rapamycin. *Cancer Research* **69** 7311–7319.
