# Supplementary material
Source: PubMed Central journal article supplement (PMC3717591)
Supplement: NIHMS481378-supplement-Table_2.pdf [file NIHMS481378-supplement-Table_2.pdf]

**Supplementary Table 2** Sequences of primers for PAK isoform-specific RT-PCR of human thyroid cell lines and human tissue samples

| <b>SYBR Green</b> |                                 |                                    |                  |
|-------------------|---------------------------------|------------------------------------|------------------|
| <b>Isoform</b>    | <b>Forward</b>                  | <b>Reverse</b>                     | <b>Size (bp)</b> |
| <b>PAK1</b>       | TAT GAT TGG AGC CGG CAG C       | CTG AAG GGA GAG AAA TCT CTG GC     | 173              |
| <b>PAK2</b>       | CAT CTT TAG CAC TGG AGG CAA AGA | ATG GTG TGC TCA AAA TCA GAT GG     | 189              |
| <b>PAK3</b>       | CAA CCG GGA TTC TTC AGC ACT     | CAC ATG AAT CGT ATG CTC AAA GTC TG | 184              |
| <b>PAK6</b>       | CCT AGC CCT AAG ACC CGG G       | GCG GTC GGA AAG AGG AGT TG         | 142              |

| <b>Universal Master Mix</b> |                  |                               |
|-----------------------------|------------------|-------------------------------|
| <b>Isoform</b>              | <b>Size (bp)</b> | <b>Catalogue number (LTC)</b> |
| <b>PAK4</b>                 | 59               | Hs0110061_m1                  |
| <b>PAK5</b>                 | 82               | Hs00379321_m1                 |
