# Supplementary material
Source: PubMed Central journal article supplement (PMC3717591)
Supplement: NIHMS481378-supplement-Table_3.pdf [file NIHMS481378-supplement-Table_3.pdf]

**Supplementary Table 3** Sequence-specific primers and probes for PAK isoform-specific quantitative RT-PCR of siRNA experiments

| Isoform     | RT-PCR using Universal Master Mix |                        |
|-------------|-----------------------------------|------------------------|
|             | Size (bp)                         | Catalogue number (LTC) |
| <b>PAK1</b> | 93                                | Hs00176815_m1          |
| <b>PAK2</b> | 143                               | Hs00605586_m1          |
| <b>PAK3</b> | 62                                | Hs00176828_m1          |

LTC: Life Technologies Corporation
